# Supplementary material for: Effects of Graphene on the Transport of Quinolones in Porous Media
Source: MDPI journal article supplement (doi:10.3390/w15030593), 2023-02-02
Supplement: s1 [file s1]

Archive with 1 entries (1 files):
- water-2074271-supplementary.pdf
