# Supplementary material for: Effects of Graphene on the Transport of Quinolones in Porous Media
Source: MDPI journal article supplement (doi:10.3390/w15030593), 2023-02-02
Supplement: s1 [file s1 › water-2074271-supplementary.pdf]

## Supplementary Material

# Effects of Graphene on the Transport of Quinolones in Porous Media

Zhou Cheng <sup>1,2,†</sup>, Cehui Mo <sup>1,†</sup>, Ming Wu <sup>1,3,4,\*</sup>, Huihui Cao <sup>1</sup>, Yanru Hao <sup>1</sup>, Guoping Lu <sup>1</sup>, Qusheng Li <sup>5</sup>, Jianfeng Wu <sup>3</sup>, Jichun Wu <sup>3</sup> and Bill X. Hu <sup>6</sup>

<sup>1</sup> Guangdong Provincial Research Center for Environment Pollution Control and Remediation Materials, College of Life Science and Technology, Jinan University, Guangzhou 510632, China

<sup>2</sup> Soil Environment Research Department, Guangdong Provincial Academy of Environmental Science, Guangzhou 510045, China

<sup>3</sup> Key Laboratory of Surficial Geochemistry, Ministry of Education, Department of Hydrosiences, School of Earth Sciences and Engineering, Nanjing University, Nanjing 210023, China

<sup>4</sup> Guangdong Yixin Ecological Technology Co., Ltd., Guangzhou 510055, China

<sup>5</sup> Guangdong Key Laboratory of Environmental Pollution and Health, School of Environment, Jinan University, Guangzhou 510632, China

<sup>6</sup> School of Water Conservancy and Environment, University of Jinan, Jinan 250022, China

\* Correspondence: wumingnj@foxmail.com

† These authors contributed equally to this work.

**Table S1.** Zeta potential of QS and GN

| Electrolyte      | IS (mM) | Zeta potential values (mV) |       |
|------------------|---------|----------------------------|-------|
|                  |         | SS                         | GN    |
| Na <sup>+</sup>  | 0.1     | -22.3                      | -53.5 |
|                  | 1       | -18.5                      | -38.4 |
|                  | 10      | -14.8                      | -32.8 |
| Ca <sup>2+</sup> | 0.1     | -10.7                      | -22.5 |
|                  | 0.5     | -5.20                      | -15.6 |
|                  | 5       | 1.11                       | -5.36 |

**Table S2.** Parameters of adsorption kinetics models

| NO. | Absorbate | Adsorbent | Pseudo first order     |                                      |       | Pseudo second order                                        |                                      |       | Elovich                                               |                                      |       |
|-----|-----------|-----------|------------------------|--------------------------------------|-------|------------------------------------------------------------|--------------------------------------|-------|-------------------------------------------------------|--------------------------------------|-------|
|     |           |           | $k_1(\text{min}^{-1})$ | $F_1(\text{mg} \cdot \text{g}^{-1})$ | $R^2$ | $k_2(\text{g} \cdot \text{mg}^{-1} \cdot \text{min}^{-1})$ | $F_2(\text{mg} \cdot \text{g}^{-1})$ | $R^2$ | $k_3(\text{mg} \cdot \text{g}^{-1} \cdot \text{min})$ | $F_3(\text{mg} \cdot \text{g}^{-1})$ | $R^2$ |
| 1   | CIP       | GN        | 0.0204                 | 142                                  | 0.975 | $1.01 \times 10^{-4}$                                      | 161                                  | 0.981 | 16.9                                                  | $5.26 \times 10^{-2}$                | 0.954 |
| 2   | NOR       | GN        | 0.00795                | 114                                  | 0.970 | $8.40 \times 10^{-5}$                                      | 128                                  | 0.988 | 5.04                                                  | $4.31 \times 10^{-2}$                | 0.968 |

**Table S3.** Fitting parameters of isothermal models

| NO. | Absorbate | Adsorbent       | Langmuir                           |                                               |       | Freundlich                           |                                    |       | Temkin                             |                                     |       |
|-----|-----------|-----------------|------------------------------------|-----------------------------------------------|-------|--------------------------------------|------------------------------------|-------|------------------------------------|-------------------------------------|-------|
|     |           |                 | $K_L(\text{L}\cdot\text{mg}^{-1})$ | $S_{\text{max}}(\text{mg}\cdot\text{g}^{-1})$ | $R^2$ | $K_F(\text{L}\cdot\text{mg}^{-1})^n$ | $1/n(\text{mg}\cdot\text{g}^{-1})$ | $R^2$ | $A_T(\text{L}\cdot\text{mg}^{-1})$ | $b_T(\text{J}\cdot\text{mol}^{-1})$ | $R^2$ |
| 1   | CIP       | SS <sup>1</sup> | 0.202                              | 3.49                                          | 0.983 | 1.17                                 | 0.237                              | 0.882 | 2.31                               | $3.99 \times 10^3$                  | 0.957 |
| 2   | CIP       | GN              | 0.0220                             | 271                                           | 0.991 | 7.19                                 | 0.736                              | 0.972 | 0.741                              | 63.7                                | 0.900 |
| 3   | NOR       | SS              | 0.691                              | 4.50                                          | 0.964 | 2.01                                 | 0.214                              | 0.921 | 26.5                               | $4.25 \times 10^3$                  | 0.959 |
| 4   | NOR       | GN              | 0.0269                             | 179                                           | 0.980 | 13.7                                 | 0.482                              | 0.970 | 1.84                               | $1.04 \times 10^2$                  | 0.764 |

<sup>1</sup>SS represents SS

**Table S4.** The fitted equations of BDST parameters and mass recovery rate of CIP

| Paremeter                                | $k_b$ <sup>1</sup> (mg <sup>-1</sup> ·min <sup>-1</sup> ·L)                               | $N_0$ <sup>2</sup> (mg·L <sup>-1</sup> )                                           | RE <sub>CIP</sub> <sup>3</sup> (%)                                             |
|------------------------------------------|-------------------------------------------------------------------------------------------|------------------------------------------------------------------------------------|--------------------------------------------------------------------------------|
| $P_{GN}$ <sup>4</sup> (%)                | $k_b = -5.52 \times 10^{-2} P_{GN} + 6.78 \times 10^{-3}$<br>(R <sup>2</sup> =0.714)      | $N_0 = -3.12 \times 10^6 P_{GN} + 9.14 \times 10^4$<br>(R <sup>2</sup> =0.921)     | $RE_{CIP} = -1.03 \times 10^3 P_{GN} + 76.4$<br>(R <sup>2</sup> =0.952)        |
| $v$ <sup>5</sup> (cm·min <sup>-1</sup> ) | $k_b = 2.74 \times 10^{-2} v + 1.96 \times 10^{-4}$<br>(R <sup>2</sup> =0.999)            | $N_0 = -5.34 \times 10^3 v + 4.55 \times 10^4$<br>(R <sup>2</sup> =0.992)          | $RE_{CIP} = 55.2v + 51.9$<br>(R <sup>2</sup> =0.998)                           |
| $IS_{NaCl}$ <sup>6</sup> (mM)            | $k_b = 4.86 \times 10^{-5} IS_{NaCl} + 5.72 \times 10^{-3}$<br>(R <sup>2</sup> =0.543)    | $N_0 = -4.70 \times 10^2 IS_{NaCl} + 4.44 \times 10^4$<br>(R <sup>2</sup> =0.998)  | $RE_{CIP} = 1.02 IS_{NaCl} + 66.0$<br>(R <sup>2</sup> =0.726)                  |
| $IS_{CaCl_2}$ (mM)                       | $k_b = -2.13 \times 10^{-4} IS_{CaCl_2} + 6.34 \times 10^{-3}$<br>(R <sup>2</sup> =0.671) | $N_0 = 1.75 \times 10^2 IS_{CaCl_2} + 4.58 \times 10^4$<br>(R <sup>2</sup> =0.925) | $RE_{CIP} = 8.27 \times 10^{-1} IS_{CaCl_2} + 63.8$<br>(R <sup>2</sup> =0.798) |

<sup>1</sup> $k_b$  is the rate constant (mg<sup>-1</sup>·min<sup>-1</sup>·L);<sup>2</sup> $N_0$  is the adsorption capacity of GN (mg·L<sup>-1</sup>);<sup>3</sup>RE<sub>CIP</sub> is the mass recovery rate of CIP (%);<sup>4</sup> $P_{GN}$  represents the mass fraction of GN (%);<sup>5</sup> $v$  represents flow velocity (cm·min<sup>-1</sup>);<sup>6</sup> $IS$  represents ionic strength (mM)

**Table S5.** The fitted equations of BDST parameters and mass recovery rate of NOR

| Paremeter                   | $k_b$ (mg <sup>-1</sup> ·min <sup>-1</sup> ·L)                                           | $N_0$ (mg·L <sup>-1</sup> )                                                        | RE <sub>NOR</sub> <sup>1</sup> (%)                                      |
|-----------------------------|------------------------------------------------------------------------------------------|------------------------------------------------------------------------------------|-------------------------------------------------------------------------|
| $P_{GN}$ (%)                | $k_b = -1.10 \times 10^{-2} P_{GN} + 7.30 \times 10^{-3}$<br>(R <sup>2</sup> =0.173)     | $N_0 = -1.67 \times 10^6 P_{GN} + 7.62 \times 10^4$<br>(R <sup>2</sup> =0.800)     | $RE_{NOR} = -7.44 \times 10^2 P_{GN} + 78.7$<br>(R <sup>2</sup> =0.964) |
| $v$ (cm·min <sup>-1</sup> ) | $k_b = 4.02 \times 10^{-2} v - 1.24 \times 10^{-3}$<br>(R <sup>2</sup> =0.999)           | $N_0 = -9.77 \times 10^3 v + 2.39 \times 10^4$<br>(R <sup>2</sup> =0.958)          | $RE_{NOR} = 49.7 v + 50.4$<br>(R <sup>2</sup> =0.949)                   |
| $IS_{NaCl}$ (mM)            | $k_b = 2.03 \times 10^{-4} IS_{NaCl} + 7.45 \times 10^{-3}$<br>(R <sup>2</sup> =0.755)   | $N_0 = -1.87 \times 10^2 IS_{NaCl} + 2.14 \times 10^4$<br>(R <sup>2</sup> =0.977)  | $RE_{NOR} = 1.38 IS_{NaCl} + 60.9$<br>(R <sup>2</sup> =0.898)           |
| $IS_{CaCl_2}$ (mM)          | $k_b = 3.02 \times 10^{-5} IS_{CaCl_2} + 5.88 \times 10^{-3}$<br>(R <sup>2</sup> =0.165) | $N_0 = 5.42 \times 10^2 IS_{CaCl_2} + 2.37 \times 10^4$<br>(R <sup>2</sup> =0.283) | $RE_{NOR} = 1.70 IS_{CaCl_2} + 59.2$<br>(R <sup>2</sup> =0.976)         |

<sup>1</sup>RE<sub>NOR</sub> is the mass recovery rate of NOR (%)

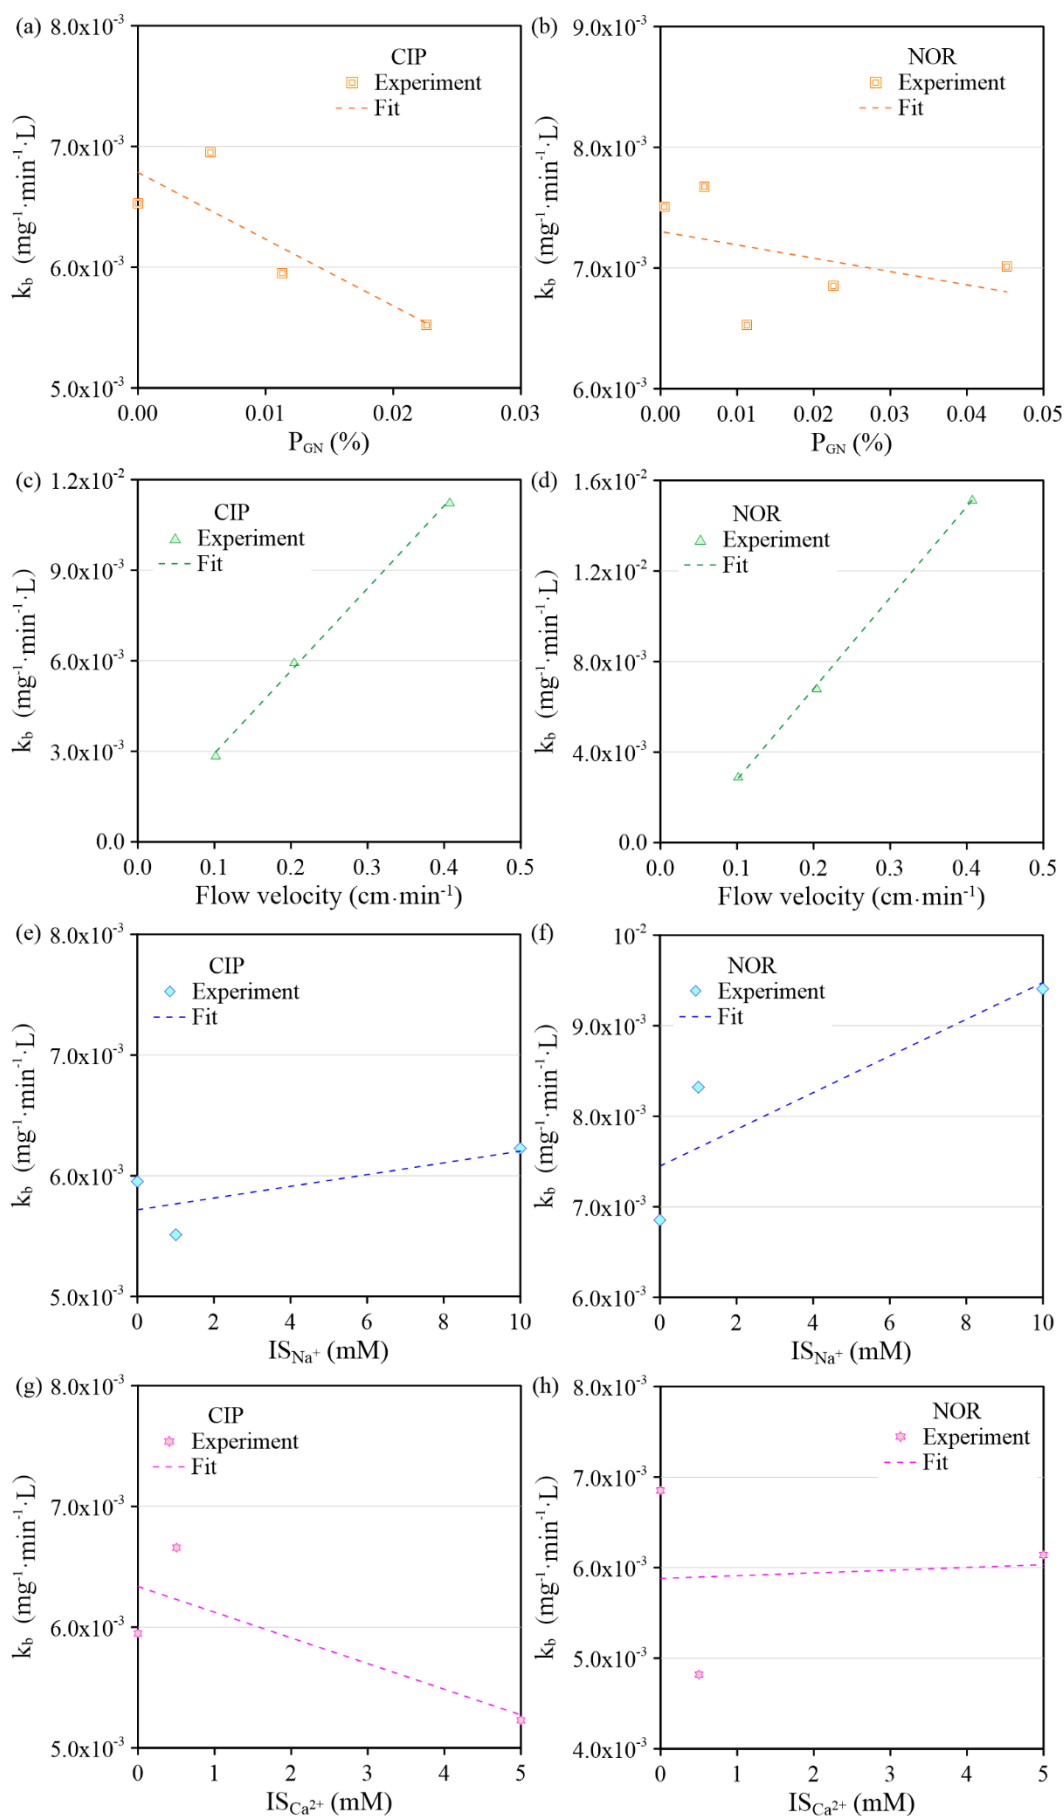

**Figure S1.** The value of  $k_b$  under different physicochemical conditions: (a) Variation of  $k_b$  with the mass fraction of GN for CIP; (b) Variation of  $k_b$  with the mass fraction of GN for NOR; (c) Variation of  $k_b$  with flow velocity for CIP; (d) Variation of  $k_b$  with flow velocity for NOR; (e) Variation of  $k_b$  with ionic strength (Na<sup>+</sup>) for CIP; (f) Variation of  $k_b$  with ionic strength (Na<sup>+</sup>) for NOR; (g) Variation of  $k_b$  with ionic strength (Ca<sup>2+</sup>) for CIP; (h) Variation of  $k_b$  with ionic strength (Ca<sup>2+</sup>) for NOR

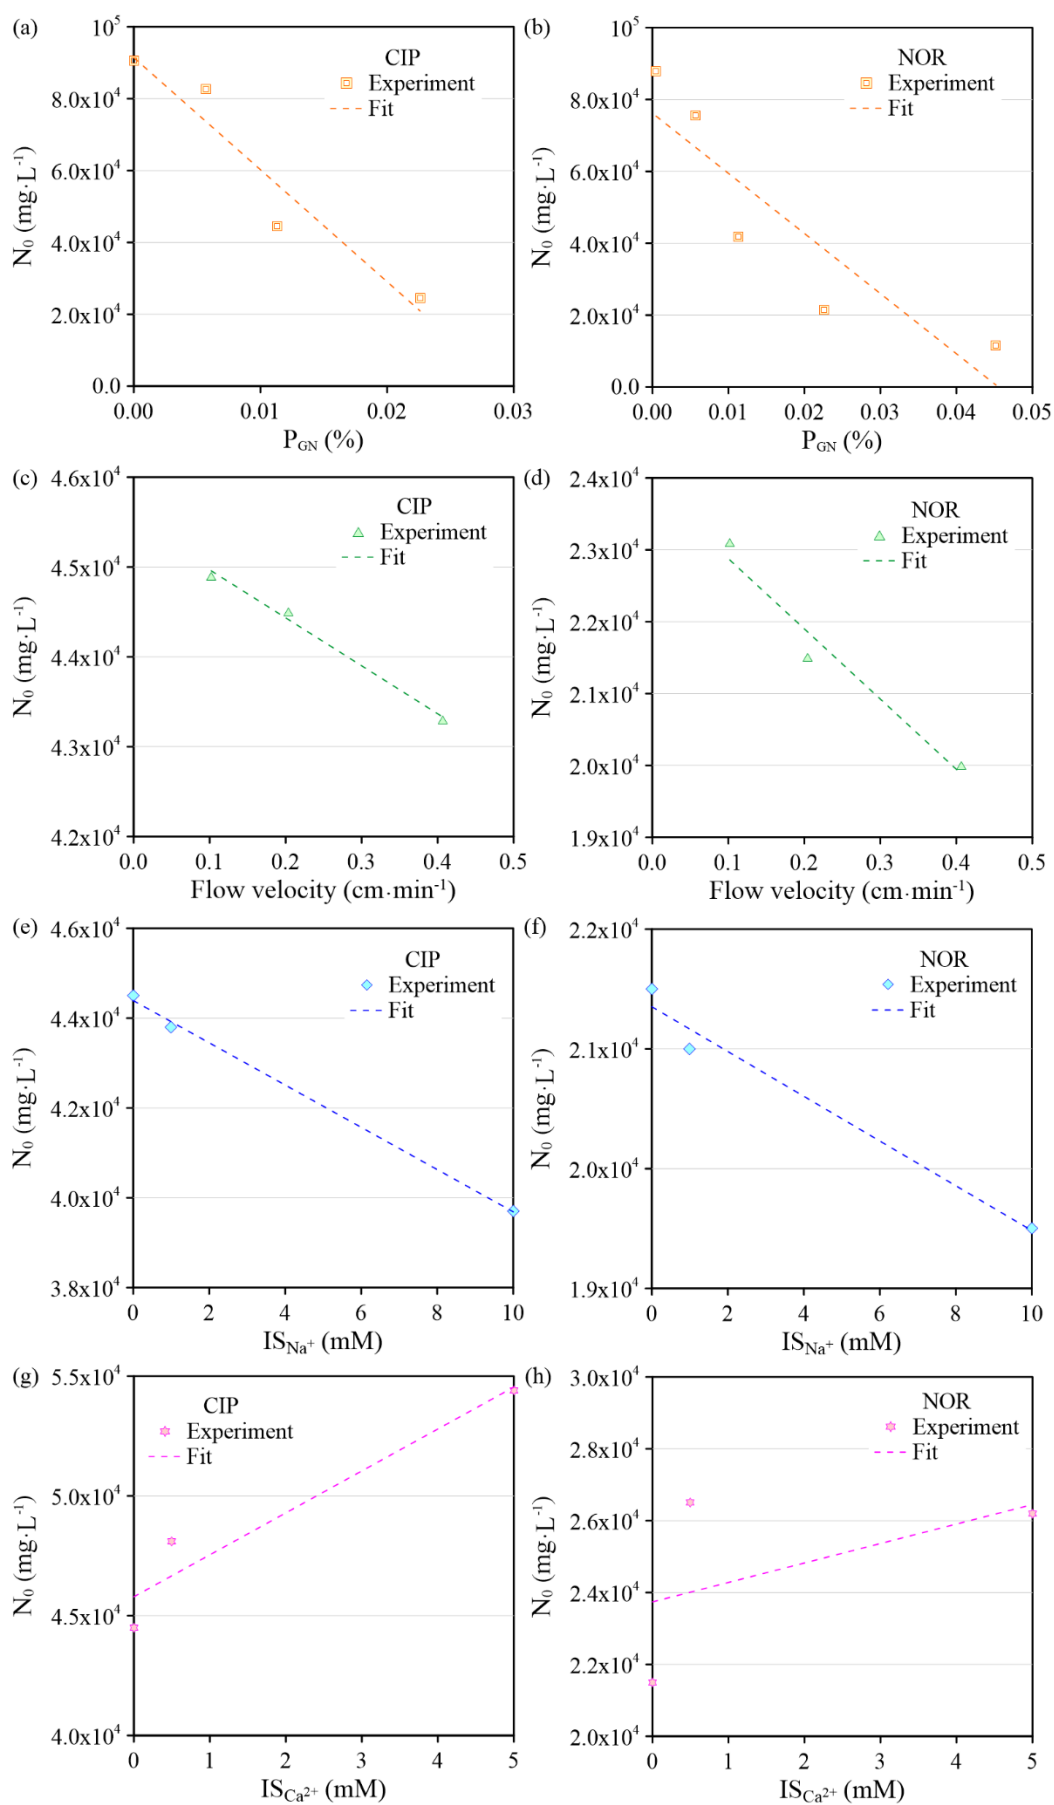

**Figure S2.** The value of  $N_0$  under different physicochemical conditions: (a) Variation of  $N_0$  with the mass fraction of GN for CIP; (b) Variation of  $N_0$  with the mass fraction of GN for NOR; (c) Variation of  $N_0$  with flow velocity for CIP; (d) Variation of  $N_0$  with flow velocity for NOR; (e) Variation of  $N_0$  with ionic strength ( $Na^+$ ) for CIP; (f) Variation of  $N_0$  with ionic strength ( $Na^+$ ) for NOR; (g) Variation of  $N_0$  with ionic strength ( $Ca^{2+}$ ) for CIP; (h) Variation of  $N_0$  with ionic strength ( $Ca^{2+}$ ) for NOR

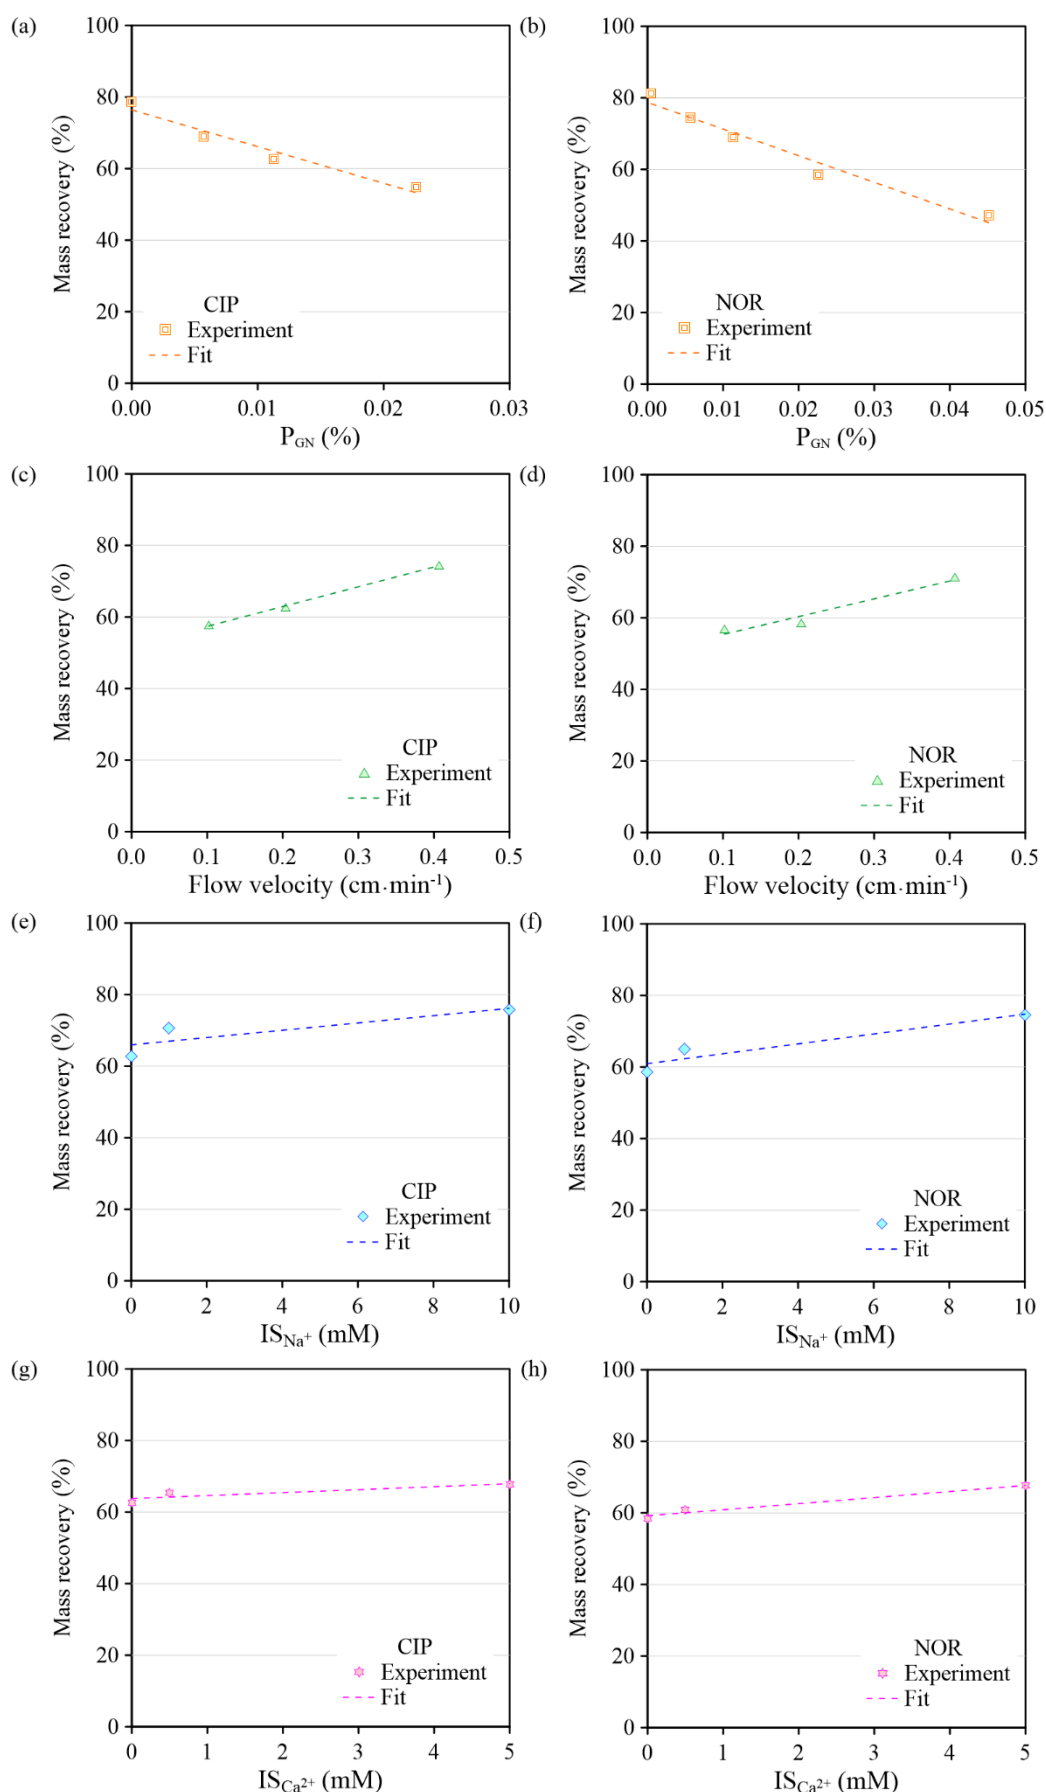

**Figure S3.** Mass recovery rate of CIP and NOR under different physicochemical conditions: (a) The change of mass recovery rate of CIP with the mass fraction of GN; (b) The change of mass recovery rate of NOR with the mass fraction of GN; (c) The change of mass recovery rate of CIP with flow velocity; (d) The change of mass recovery rate of NOR with flow velocity; (e) The change of mass recovery rate of CIP with ionic strength ( $Na^+$ ); (f) The change of mass recovery rate of NOR with ionic strength ( $Na^+$ ); (g) The change of mass recovery rate of CIP with ionic strength ( $Ca^{2+}$ ); (h) The change of mass recovery rate of NOR with ionic strength ( $Ca^{2+}$ )
